# Supplementary material
Source: PubMed Central journal article supplement (PMC10360659)

**Supplementary Table 1. Primer Sequences**

| Name         | Sequence                |
|--------------|-------------------------|
| AMT_F        | TGGGAATGACATTGATGAACA   |
| AMT_R        | CTCCAGGGAAGTCCATAGCA    |
| C2CD4A_F     | GGTGCAGAGACCCATCTGAC    |
| C2CD4A_R     | GCTCCAGGCACCACATCT      |
| FOXA1_F      | AGGGCTGGATGGTTGTATTG    |
| FOXA1_R      | ACCGGGACGGAGGAGTAG      |
| LYZ_F        | CCGCTACTGGTGTAAATGATGG  |
| LYZ_R        | CATCAGCGATGTTATCTTGCGAG |
| MMP1_F       | CAGAGATGAAGTCCGGTTTTTC  |
| MMP1_R       | GGGGTATCCGTGTAGCACAT    |
| MMP9_F       | GAACCAATCTCACCGACAGG    |
| MMP9_R       | GCCACCCGAGTGTAAACCATA   |
| PIGR_F       | ACTGCAGCCGTCTATGTGG     |
| PIGR_R       | CTTCGCTAGGCTGACATCG     |
| RCC1_F       | CGATGATGGCCGTGTCTT      |
| RCC1_R       | TCCAACAGTCCAATCACACC    |
| Actin Beta_F | CCTTTGCCGATCCGCCG       |
| Actin Beta_R | GATATCATCCATGGTGAGCTGG  |

*F*, forward; *R*, reverse

**Supplementary Table 2:** Model performance in estimating the risk of LNM in the training cohort using each panel

| Variable       | Value (95% CI)   |                  |                                           |
|----------------|------------------|------------------|-------------------------------------------|
|                | 4-miRNA panel    | 5-mRNA panel     | Combination panel<br>(4-miRNA and 5-mRNA) |
| Cutoff value   | 0.08             | 0.05             | 0.08                                      |
| Sensitivity, % | 80.0 (28.4–99.5) | 80.0 (28.4–99.4) | 80.0 (28.4–99.5)                          |
| Specificity, % | 70.7 (54.5–83.9) | 78.1 (62.4–89.4) | 92.7 (80.1–98.5)                          |
| AUC, %         | 78.4 (63.9–89.3) | 77.1 (62.3–88.2) | 85.5 (71.8–94.0)                          |
| PPV, %         | 25.0 (14.9–38.9) | 30.8 (17.7–47.8) | 57.1 (29.2–81.2)                          |
| NPV, %         | 96.7 (83.2–99.4) | 97.0 (84.6–99.5) | 97.4 (86.8–99.5)                          |

*AUC*, area under the curve; *PPV*, positive predictive value; *NPV*, negative predictive value; *LNM*, lymph node metastasis; *CI*, confidence interval

**Supplementary Table 3: Univariate logistic regression analysis for LNM**

| Variable | 4-miRNA panel | 5-mRNA panel | Combination panel<br>(4-miRNA and 5-mRNA) |
|----------|---------------|--------------|-------------------------------------------|
| OR       | 8.62          | 8.44         | 14.22                                     |
| 95% CI   | 0.87–84.90    | 0.99–71.83   | 1.41–143.67                               |
| P value  | 0.06          | 0.05         | 0.02                                      |

OR, odds ratio; CI, confidence interval; LNM, lymph node metastasis

**A**

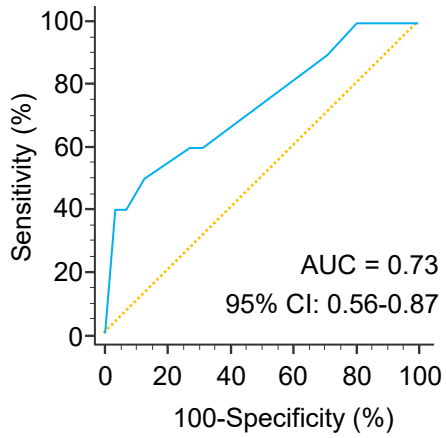

**B**

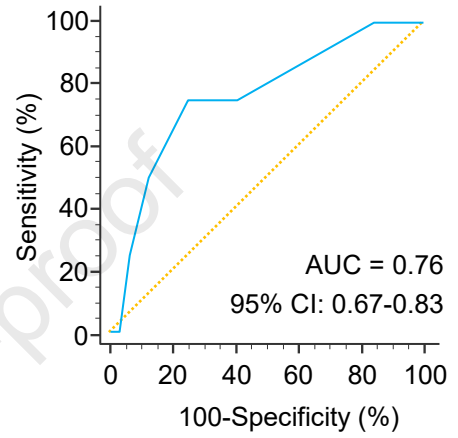

Supplement: NIHMS1913336-supplement-1.pdf [file NIHMS1913336-supplement-1.pdf]
